# Supplementary material
Source: publisher figshare collection journal article supplement (https://acs.figshare.com/ndownloader/files/5218132)
Supplement: Supplementary file 1 [file 5218132]

data_publication_text
_publ_section_title
;Phosphaadamantanes as Ligands for Palladium Catalyzed
Cross-Coupling Chemistry: Library Synthesis, Characterization
and Screening in the Suzuki-Coupling of Alkyl Halides and
Tosylates Containing beta-Hydrogens with Boronic Acids and Alkylboranes
;
_publ_requested_journal          J.Org.Chem.
_publ_contact_author_name        'Professor Alfredo Capretta'
_publ_contact_author_address
;Department of Chemistry
McMaster University
Hamilton
Ontario
Canada
L8S 4M1
;
_publ_contact_author_email       capretta@mcmaster.ca
_publ_contact_author_phone       1(905)5259140x27318
_publ_contact_author_fax         1(905)5222509
loop_
_publ_author_name
_publ_author_address
'Capretta, A'
;Department of Chemistry
McMaster University
1280 Main Str West
Hamilton
Ontario L8S 4M1
Canada
;
'McNulty, J'
;Department of Chemistry
McMaster University
Hamilton
Ontario
Canada
L8S 4M1
;
'Brenstrum, T'
;Department of Chemistry
McMaster University
Hamilton
Ontario
Canada
L8S 4M1
;
'Gerritsma, D'
;Department of Chemistry
McMaster University
Hamilton
Ontario
Canada
L8S 4M1
;
'Britten, J'
;Department of Chemistry
McMaster University
Hamilton
Ontario
Canada
L8S 4M1
;
'Adjabeng, G'
;Medicinal Chemistry
Roche Pharmaceuticals
3431 Hillview Avenue
Palo Alto
California 94304
USA
;
'Frampton, C'
;Bruker Nonius B.V.
Oostsingel 209
2612 HL Delft
The Netherlands
;
'Robertson, A'
;Cytec Canada Inc.
PO Box 240
Niagara Falls
Ontario L2E 6T4
Canada
;
data_padmbm
_audit_creation_method           SHELXL-97
_chemical_name_systematic
;
1,3,5,7-tetramethyl-6-(2,4-dimethoxyphenyl)-2,4,8-trioxa-6-phospha-adamantane
;
_chemical_name_common            2,4-dimethoxyphenylphosphaadamantane
_chemical_melting_point          282
_chemical_formula_moiety         'C18 H25 O5 P'
_chemical_formula_sum            'C18 H25 O5 P'
_chemical_formula_weight         352.35

loop_
_atom_type_symbol
_atom_type_description
_atom_type_scat_dispersion_real
_atom_type_scat_dispersion_imag
_atom_type_scat_source
C C 0.0181 0.0091 'International Tables Vol C Tables 4.2.6.8 and 6.1.1.4'
H H 0.0000 0.0000 'International Tables Vol C Tables 4.2.6.8 and 6.1.1.4'
O O 0.0492 0.0322 'International Tables Vol C Tables 4.2.6.8 and 6.1.1.4'
P P 0.2955 0.4335 'International Tables Vol C Tables 4.2.6.8 and 6.1.1.4'

_symmetry_cell_setting           triclinic
_symmetry_space_group_name_H-M   'P -1'
_symmetry_int_tables_number      2

loop_
_symmetry_equiv_pos_as_xyz
'x, y, z'
'-x, -y, -z'

_cell_length_a                   8.02170(10)
_cell_length_b                   8.16080(10)
_cell_length_c                   14.4538(2)
_cell_angle_alpha                83.4460(10)
_cell_angle_beta                 76.3320(10)
_cell_angle_gamma                89.2410(10)
_cell_volume                     913.30(2)
_cell_formula_units_Z            2
_cell_measurement_temperature    295(2)
_cell_measurement_reflns_used    3561
_cell_measurement_theta_min      3.17
_cell_measurement_theta_max      67.75

_exptl_crystal_description       rod
_exptl_crystal_colour            colourless
_exptl_crystal_size_max          0.40
_exptl_crystal_size_mid          0.20
_exptl_crystal_size_min          0.15
_exptl_crystal_density_meas      0
_exptl_crystal_density_diffrn    1.281
_exptl_crystal_density_method    'not measured'
_exptl_crystal_F_000             376
_exptl_absorpt_coefficient_mu    1.540
_exptl_absorpt_correction_type   multi-scan
_exptl_absorpt_correction_T_min  .845
_exptl_absorpt_correction_T_max  1.000
_exptl_absorpt_process_details   SADABS

_exptl_special_details
;
  ?
;

_diffrn_ambient_temperature      295(2)
_diffrn_radiation_probe          x-ray
_diffrn_radiation_type           CuK\a
_diffrn_radiation_wavelength     1.54178
_diffrn_source                   'rotating anode'
_diffrn_source_type              'C18 H25 O5 P'
_diffrn_radiation_monochromator  mirrors
_diffrn_measurement_device_type  'CCD area detector'
_diffrn_measurement_method       'phi and omega scans'
_diffrn_detector_area_resol_mean ?
_diffrn_standards_number         ?
_diffrn_standards_interval_count ?
_diffrn_standards_interval_time  ?
_diffrn_standards_decay_%        ?
_diffrn_reflns_number            6937
_diffrn_reflns_av_R_equivalents  0.0275
_diffrn_reflns_av_sigmaI/netI    0.0368
_diffrn_reflns_limit_h_min       -9
_diffrn_reflns_limit_h_max       8
_diffrn_reflns_limit_k_min       -9
_diffrn_reflns_limit_k_max       9
_diffrn_reflns_limit_l_min       -17
_diffrn_reflns_limit_l_max       16
_diffrn_reflns_theta_min         3.17
_diffrn_reflns_theta_max         68.25
_reflns_number_total             3116
_reflns_number_gt                2856
_reflns_threshold_expression     >2sigma(I)

_computing_data_collection       'Bruker SMART'
_computing_cell_refinement       'Bruker SMART'
_computing_data_reduction        'Bruker SAINT'
_computing_structure_solution    'SHELXS-97 (Sheldrick, 1990)'
_computing_structure_refinement  'SHELXL-97 (Sheldrick, 1997)'
_computing_molecular_graphics    'Bruker SHELXTL'
_computing_publication_material  'Bruker SHELXTL'

_refine_special_details
;
  Refinement of F^2^ against ALL reflections.  The weighted R-factor wR and
  goodness of fit S are based on F^2^, conventional R-factors R are based
  on F, with F set to zero for negative F^2^. The threshold expression of
  F^2^ > 2sigma(F^2^) is used only for calculating R-factors(gt) etc. and is
  not relevant to the choice of reflections for refinement.  R-factors based
  on F^2^ are statistically about twice as large as those based on F, and R-
  factors based on ALL data will be even larger.
;

_refine_ls_structure_factor_coef Fsqd
_refine_ls_matrix_type           full
_refine_ls_weighting_scheme      calc
_refine_ls_weighting_details
'calc w=1/[\s^2^(Fo^2^)+(0.0561P)^2^+0.1562P] where P=(Fo^2^+2Fc^2^)/3'
_atom_sites_solution_primary     direct
_atom_sites_solution_secondary   difmap
_atom_sites_solution_hydrogens   difmap
_refine_ls_hydrogen_treatment    refall
_refine_ls_extinction_method     SHELXL
_refine_ls_extinction_coef       0.0059(7)
_refine_ls_extinction_expression Fc^*^=kFc[1+0.001xFc^2^\l^3^/sin(2\q)]^-1/4^
_refine_ls_number_reflns         3116
_refine_ls_number_parameters     318
_refine_ls_number_restraints     0
_refine_ls_R_factor_all          0.0369
_refine_ls_R_factor_gt           0.0346
_refine_ls_wR_factor_ref         0.1005
_refine_ls_wR_factor_gt          0.0979
_refine_ls_goodness_of_fit_ref   1.071
_refine_ls_restrained_S_all      1.071
_refine_ls_shift/su_max          0.012
_refine_ls_shift/su_mean         0.001

loop_
_atom_site_label
_atom_site_type_symbol
_atom_site_fract_x
_atom_site_fract_y
_atom_site_fract_z
_atom_site_U_iso_or_equiv
_atom_site_adp_type
_atom_site_occupancy
_atom_site_symmetry_multiplicity
_atom_site_calc_flag
_atom_site_refinement_flags
_atom_site_disorder_assembly
_atom_site_disorder_group
P P 0.35712(5) 0.40570(4) 0.77323(3) 0.03685(15) Uani 1 1 d . . .
O1 O 0.35053(13) 0.31653(12) 0.95844(7) 0.0392(3) Uani 1 1 d . . .
O2 O 0.25793(13) 0.04235(12) 0.96684(7) 0.0394(3) Uani 1 1 d . . .
O3 O 0.25872(13) 0.06837(12) 0.80355(7) 0.0367(2) Uani 1 1 d . . .
O4 O 0.61586(16) 0.63067(14) 0.65749(9) 0.0525(3) Uani 1 1 d . . .
O5 O 0.83863(16) 0.33114(16) 0.39404(8) 0.0574(3) Uani 1 1 d . . .
C1 C 0.47140(19) 0.31194(18) 0.86622(10) 0.0360(3) Uani 1 1 d . . .
C2 C 0.20492(19) 0.20915(18) 0.97588(10) 0.0387(3) Uani 1 1 d . . .
C3 C 0.35842(19) 0.02452(18) 0.87246(10) 0.0361(3) Uani 1 1 d . . .
C4 C 0.19192(19) 0.23480(18) 0.80284(11) 0.0379(3) Uani 1 1 d . . .
C5 C 0.09289(19) 0.2549(2) 0.90544(11) 0.0410(3) Uani 1 1 d . . .
C6 C 0.51858(19) 0.13286(18) 0.85459(11) 0.0368(3) Uani 1 1 d . . .
C7 C 0.6238(2) 0.4166(2) 0.86920(13) 0.0452(4) Uani 1 1 d . . .
C8 C 0.1129(3) 0.2151(2) 1.07947(12) 0.0508(4) Uani 1 1 d . . .
C9 C 0.3977(2) -0.15619(19) 0.86961(13) 0.0454(4) Uani 1 1 d . . .
C10 C 0.0751(2) 0.2474(2) 0.73400(14) 0.0499(4) Uani 1 1 d . . .
C11 C 0.50457(19) 0.36433(18) 0.66071(10) 0.0379(3) Uani 1 1 d . . .
C12 C 0.6204(2) 0.49168(18) 0.61201(11) 0.0397(3) Uani 1 1 d . . .
C13 C 0.7316(2) 0.4752(2) 0.52451(11) 0.0442(4) Uani 1 1 d . . .
C14 C 0.7264(2) 0.3325(2) 0.48142(11) 0.0426(4) Uani 1 1 d . . .
C15 C 0.6150(2) 0.2046(2) 0.52681(11) 0.0451(4) Uani 1 1 d . . .
C16 C 0.5066(2) 0.2222(2) 0.61552(11) 0.0431(4) Uani 1 1 d . . .
C17 C 0.7315(3) 0.7615(3) 0.61286(19) 0.0662(6) Uani 1 1 d . . .
C18 C 0.8231(3) 0.1990(3) 0.34054(16) 0.0664(6) Uani 1 1 d . . .
H5A H -0.010(2) 0.180(2) 0.9223(13) 0.050(5) Uiso 1 1 d . . .
H5B H 0.054(2) 0.365(2) 0.9104(13) 0.048(5) Uiso 1 1 d . . .
H6A H 0.586(2) 0.121(2) 0.7927(14) 0.049(5) Uiso 1 1 d . . .
H6B H 0.584(2) 0.090(2) 0.9037(13) 0.044(4) Uiso 1 1 d . . .
H7A H 0.589(3) 0.522(3) 0.8841(15) 0.065(6) Uiso 1 1 d . . .
H7B H 0.705(3) 0.426(3) 0.8091(16) 0.063(6) Uiso 1 1 d . . .
H7C H 0.674(3) 0.364(3) 0.9202(16) 0.064(6) Uiso 1 1 d . . .
H8A H 0.073(3) 0.327(3) 1.0871(15) 0.062(6) Uiso 1 1 d . . .
H8B H 0.194(3) 0.185(3) 1.1232(16) 0.071(6) Uiso 1 1 d . . .
H8C H 0.014(3) 0.145(3) 1.0971(15) 0.067(6) Uiso 1 1 d . . .
H9A H 0.465(3) -0.193(3) 0.9171(16) 0.065(6) Uiso 1 1 d . . .
H9B H 0.463(3) -0.176(3) 0.8060(16) 0.064(6) Uiso 1 1 d . . .
H9C H 0.291(3) -0.221(3) 0.8834(14) 0.062(6) Uiso 1 1 d . . .
H10A H -0.014(3) 0.166(3) 0.7555(15) 0.064(6) Uiso 1 1 d . . .
H10B H 0.026(3) 0.354(3) 0.7287(14) 0.061(6) Uiso 1 1 d . . .
H10C H 0.143(3) 0.232(3) 0.6695(17) 0.070(6) Uiso 1 1 d . . .
H13 H 0.810(3) 0.565(3) 0.4893(14) 0.059(5) Uiso 1 1 d . . .
H15 H 0.608(2) 0.106(3) 0.4995(14) 0.055(5) Uiso 1 1 d . . .
H16 H 0.431(3) 0.135(3) 0.6472(14) 0.059(5) Uiso 1 1 d . . .
H17A H 0.848(4) 0.723(3) 0.6095(18) 0.087(8) Uiso 1 1 d . . .
H17B H 0.712(3) 0.838(3) 0.6588(18) 0.085(7) Uiso 1 1 d . . .
H17C H 0.710(4) 0.802(4) 0.548(2) 0.120(11) Uiso 1 1 d . . .
H18A H 0.705(4) 0.187(3) 0.3298(18) 0.090(8) Uiso 1 1 d . . .
H18B H 0.860(3) 0.099(3) 0.3680(16) 0.067(6) Uiso 1 1 d . . .
H18C H 0.902(3) 0.228(3) 0.2808(19) 0.088(8) Uiso 1 1 d . . .

loop_
_atom_site_aniso_label
_atom_site_aniso_U_11
_atom_site_aniso_U_22
_atom_site_aniso_U_33
_atom_site_aniso_U_23
_atom_site_aniso_U_13
_atom_site_aniso_U_12
P 0.0439(2) 0.0284(2) 0.0364(2) -0.00458(15) -0.00519(16) 0.00111(15)
O1 0.0437(6) 0.0385(6) 0.0335(5) -0.0116(4) -0.0015(4) -0.0034(4)
O2 0.0486(6) 0.0329(5) 0.0329(5) -0.0045(4) -0.0018(4) 0.0005(4)
O3 0.0447(6) 0.0299(5) 0.0362(5) -0.0069(4) -0.0098(4) 0.0007(4)
O4 0.0662(7) 0.0370(6) 0.0486(6) -0.0114(5) 0.0013(5) -0.0108(5)
O5 0.0649(8) 0.0617(8) 0.0395(6) -0.0148(5) 0.0043(5) -0.0061(6)
C1 0.0397(7) 0.0352(8) 0.0311(7) -0.0074(5) -0.0026(6) -0.0011(6)
C2 0.0424(8) 0.0326(8) 0.0371(8) -0.0078(6) 0.0002(6) -0.0013(6)
C3 0.0444(8) 0.0329(7) 0.0300(7) -0.0056(5) -0.0060(6) 0.0033(6)
C4 0.0406(8) 0.0323(7) 0.0404(8) -0.0049(6) -0.0085(6) 0.0026(6)
C5 0.0387(8) 0.0359(8) 0.0451(9) -0.0070(6) -0.0024(6) 0.0019(6)
C6 0.0404(8) 0.0368(8) 0.0325(7) -0.0076(6) -0.0056(6) 0.0034(6)
C7 0.0448(9) 0.0443(9) 0.0462(9) -0.0106(7) -0.0075(7) -0.0055(7)
C8 0.0563(10) 0.0495(10) 0.0394(9) -0.0111(7) 0.0059(8) -0.0033(8)
C9 0.0586(10) 0.0315(8) 0.0453(9) -0.0076(7) -0.0095(8) 0.0056(7)
C10 0.0491(9) 0.0491(10) 0.0540(11) -0.0034(8) -0.0180(8) 0.0013(8)
C11 0.0465(8) 0.0332(8) 0.0328(7) -0.0023(6) -0.0078(6) -0.0004(6)
C12 0.0485(8) 0.0330(8) 0.0376(8) -0.0053(6) -0.0097(6) -0.0009(6)
C13 0.0505(9) 0.0410(9) 0.0381(8) -0.0026(6) -0.0052(7) -0.0044(7)
C14 0.0463(8) 0.0470(9) 0.0336(8) -0.0062(6) -0.0069(6) 0.0021(6)
C15 0.0583(10) 0.0384(9) 0.0393(8) -0.0103(7) -0.0097(7) -0.0008(7)
C16 0.0541(9) 0.0346(8) 0.0387(8) -0.0036(6) -0.0074(7) -0.0039(7)
C17 0.0671(13) 0.0466(11) 0.0783(15) -0.0177(10) 0.0021(11) -0.0176(9)
C18 0.0819(15) 0.0694(14) 0.0453(11) -0.0252(10) -0.0009(10) 0.0001(11)

_geom_special_details
;
  All esds (except the esd in the dihedral angle between two l.s. planes)
  are estimated using the full covariance matrix.  The cell esds are taken
  into account individually in the estimation of esds in distances, angles
  and torsion angles; correlations between esds in cell parameters are only
  used when they are defined by crystal symmetry.  An approximate (isotropic)
  treatment of cell esds is used for estimating esds involving l.s. planes.
;

loop_
_geom_bond_atom_site_label_1
_geom_bond_atom_site_label_2
_geom_bond_distance
_geom_bond_site_symmetry_2
_geom_bond_publ_flag
P C11 1.8340(15) . ?
P C4 1.8786(15) . ?
P C1 1.8871(15) . ?
O1 C2 1.4259(17) . ?
O1 C1 1.4553(16) . ?
O2 C2 1.4317(17) . ?
O2 C3 1.4334(17) . ?
O3 C3 1.4308(17) . ?
O3 C4 1.4533(17) . ?
O4 C12 1.3704(18) . ?
O4 C17 1.415(2) . ?
O5 C14 1.3680(19) . ?
O5 C18 1.420(2) . ?
C1 C7 1.512(2) . ?
C1 C6 1.523(2) . ?
C2 C8 1.511(2) . ?
C2 C5 1.523(2) . ?
C3 C9 1.507(2) . ?
C3 C6 1.523(2) . ?
C4 C10 1.514(2) . ?
C4 C5 1.534(2) . ?
C5 H5A 0.998(19) . ?
C5 H5B 0.953(19) . ?
C6 H6A 0.947(19) . ?
C6 H6B 1.007(18) . ?
C7 H7A 0.93(2) . ?
C7 H7B 0.95(2) . ?
C7 H7C 0.98(2) . ?
C8 H8A 0.97(2) . ?
C8 H8B 1.02(2) . ?
C8 H8C 0.95(2) . ?
C9 H9A 0.99(2) . ?
C9 H9B 0.97(2) . ?
C9 H9C 0.98(2) . ?
C10 H10A 0.95(2) . ?
C10 H10B 0.95(2) . ?
C10 H10C 0.98(2) . ?
C11 C16 1.393(2) . ?
C11 C12 1.410(2) . ?
C12 C13 1.384(2) . ?
C13 C14 1.387(2) . ?
C13 H13 0.98(2) . ?
C14 C15 1.382(2) . ?
C15 C16 1.390(2) . ?
C15 H15 0.94(2) . ?
C16 H16 0.94(2) . ?
C17 H17A 0.97(3) . ?
C17 H17B 0.95(3) . ?
C17 H17C 1.02(3) . ?
C18 H18A 1.01(3) . ?
C18 H18B 0.94(2) . ?
C18 H18C 0.95(3) . ?

loop_
_geom_angle_atom_site_label_1
_geom_angle_atom_site_label_2
_geom_angle_atom_site_label_3
_geom_angle
_geom_angle_site_symmetry_1
_geom_angle_site_symmetry_3
_geom_angle_publ_flag
C11 P C4 105.78(7) . . ?
C11 P C1 102.44(7) . . ?
C4 P C1 92.52(6) . . ?
C2 O1 C1 115.35(10) . . ?
C2 O2 C3 111.61(10) . . ?
C3 O3 C4 115.07(10) . . ?
C12 O4 C17 118.07(14) . . ?
C14 O5 C18 117.36(15) . . ?
O1 C1 C7 105.84(11) . . ?
O1 C1 C6 108.20(11) . . ?
C7 C1 C6 112.49(13) . . ?
O1 C1 P 105.94(9) . . ?
C7 C1 P 111.53(11) . . ?
C6 C1 P 112.33(10) . . ?
O1 C2 O2 110.49(11) . . ?
O1 C2 C8 106.15(12) . . ?
O2 C2 C8 106.72(12) . . ?
O1 C2 C5 111.92(12) . . ?
O2 C2 C5 107.63(12) . . ?
C8 C2 C5 113.82(13) . . ?
O3 C3 O2 109.85(11) . . ?
O3 C3 C9 106.77(12) . . ?
O2 C3 C9 106.94(12) . . ?
O3 C3 C6 112.15(12) . . ?
O2 C3 C6 107.86(11) . . ?
C9 C3 C6 113.14(13) . . ?
O3 C4 C10 106.03(12) . . ?
O3 C4 C5 107.25(11) . . ?
C10 C4 C5 111.75(13) . . ?
O3 C4 P 115.73(9) . . ?
C10 C4 P 112.07(11) . . ?
C5 C4 P 104.02(10) . . ?
C2 C5 C4 110.56(12) . . ?
C2 C5 H5A 109.1(11) . . ?
C4 C5 H5A 108.6(11) . . ?
C2 C5 H5B 109.7(11) . . ?
C4 C5 H5B 110.9(11) . . ?
H5A C5 H5B 107.9(15) . . ?
C1 C6 C3 110.99(12) . . ?
C1 C6 H6A 112.1(11) . . ?
C3 C6 H6A 108.3(11) . . ?
C1 C6 H6B 109.4(10) . . ?
C3 C6 H6B 106.9(10) . . ?
H6A C6 H6B 109.0(15) . . ?
C1 C7 H7A 110.8(13) . . ?
C1 C7 H7B 110.6(13) . . ?
H7A C7 H7B 109.0(18) . . ?
C1 C7 H7C 107.4(13) . . ?
H7A C7 H7C 108.2(18) . . ?
H7B C7 H7C 110.9(17) . . ?
C2 C8 H8A 108.3(13) . . ?
C2 C8 H8B 110.4(12) . . ?
H8A C8 H8B 108.9(17) . . ?
C2 C8 H8C 111.3(13) . . ?
H8A C8 H8C 106.5(18) . . ?
H8B C8 H8C 111.2(18) . . ?
C3 C9 H9A 109.8(13) . . ?
C3 C9 H9B 110.2(13) . . ?
H9A C9 H9B 109.2(17) . . ?
C3 C9 H9C 110.0(12) . . ?
H9A C9 H9C 109.9(18) . . ?
H9B C9 H9C 107.6(17) . . ?
C4 C10 H10A 109.2(12) . . ?
C4 C10 H10B 111.9(12) . . ?
H10A C10 H10B 109.6(18) . . ?
C4 C10 H10C 109.3(12) . . ?
H10A C10 H10C 111.0(18) . . ?
H10B C10 H10C 105.9(18) . . ?
C16 C11 C12 116.45(14) . . ?
C16 C11 P 126.15(12) . . ?
C12 C11 P 117.29(11) . . ?
O4 C12 C13 122.80(14) . . ?
O4 C12 C11 115.52(13) . . ?
C13 C12 C11 121.67(14) . . ?
C12 C13 C14 119.72(15) . . ?
C12 C13 H13 122.1(12) . . ?
C14 C13 H13 118.1(12) . . ?
O5 C14 C15 124.76(14) . . ?
O5 C14 C13 114.82(14) . . ?
C15 C14 C13 120.41(14) . . ?
C14 C15 C16 119.02(14) . . ?
C14 C15 H15 122.7(12) . . ?
C16 C15 H15 118.3(12) . . ?
C15 C16 C11 122.69(15) . . ?
C15 C16 H16 119.5(12) . . ?
C11 C16 H16 117.8(12) . . ?
O4 C17 H17A 108.3(15) . . ?
O4 C17 H17B 103.2(16) . . ?
H17A C17 H17B 105(2) . . ?
O4 C17 H17C 109.4(19) . . ?
H17A C17 H17C 113(2) . . ?
H17B C17 H17C 117(2) . . ?
O5 C18 H18A 113.1(15) . . ?
O5 C18 H18B 111.6(14) . . ?
H18A C18 H18B 111(2) . . ?
O5 C18 H18C 103.8(16) . . ?
H18A C18 H18C 109(2) . . ?
H18B C18 H18C 107(2) . . ?

loop_
_geom_torsion_atom_site_label_1
_geom_torsion_atom_site_label_2
_geom_torsion_atom_site_label_3
_geom_torsion_atom_site_label_4
_geom_torsion
_geom_torsion_site_symmetry_1
_geom_torsion_site_symmetry_2
_geom_torsion_site_symmetry_3
_geom_torsion_site_symmetry_4
_geom_torsion_publ_flag
C2 O1 C1 C7 -172.76(13) . . . . ?
C2 O1 C1 C6 -51.96(15) . . . . ?
C2 O1 C1 P 68.70(12) . . . . ?
C11 P C1 O1 -171.35(9) . . . . ?
C4 P C1 O1 -64.58(9) . . . . ?
C11 P C1 C7 73.95(11) . . . . ?
C4 P C1 C7 -179.28(11) . . . . ?
C11 P C1 C6 -53.40(11) . . . . ?
C4 P C1 C6 53.36(11) . . . . ?
C1 O1 C2 O2 56.41(15) . . . . ?
C1 O1 C2 C8 171.75(12) . . . . ?
C1 O1 C2 C5 -63.52(15) . . . . ?
C3 O2 C2 O1 -60.68(15) . . . . ?
C3 O2 C2 C8 -175.65(12) . . . . ?
C3 O2 C2 C5 61.80(14) . . . . ?
C4 O3 C3 O2 58.01(14) . . . . ?
C4 O3 C3 C9 173.62(12) . . . . ?
C4 O3 C3 C6 -61.92(15) . . . . ?
C2 O2 C3 O3 -61.21(14) . . . . ?
C2 O2 C3 C9 -176.72(12) . . . . ?
C2 O2 C3 C6 61.30(14) . . . . ?
C3 O3 C4 C10 -173.53(12) . . . . ?
C3 O3 C4 C5 -54.00(15) . . . . ?
C3 O3 C4 P 61.55(13) . . . . ?
C11 P C4 O3 52.22(12) . . . . ?
C1 P C4 O3 -51.46(11) . . . . ?
C11 P C4 C10 -69.53(13) . . . . ?
C1 P C4 C10 -173.21(12) . . . . ?
C11 P C4 C5 169.59(9) . . . . ?
C1 P C4 C5 65.91(10) . . . . ?
O1 C2 C5 C4 63.37(15) . . . . ?
O2 C2 C5 C4 -58.22(15) . . . . ?
C8 C2 C5 C4 -176.27(13) . . . . ?
O3 C4 C5 C2 53.28(15) . . . . ?
C10 C4 C5 C2 169.08(13) . . . . ?
P C4 C5 C2 -69.82(13) . . . . ?
O1 C1 C6 C3 51.71(15) . . . . ?
C7 C1 C6 C3 168.27(12) . . . . ?
P C1 C6 C3 -64.89(14) . . . . ?
O3 C3 C6 C1 63.75(15) . . . . ?
O2 C3 C6 C1 -57.33(15) . . . . ?
C9 C3 C6 C1 -175.40(12) . . . . ?
C4 P C11 C16 -8.69(16) . . . . ?
C1 P C11 C16 87.57(15) . . . . ?
C4 P C11 C12 167.28(12) . . . . ?
C1 P C11 C12 -96.46(13) . . . . ?
C17 O4 C12 C13 -0.6(3) . . . . ?
C17 O4 C12 C11 178.86(17) . . . . ?
C16 C11 C12 O4 179.75(14) . . . . ?
P C11 C12 O4 3.4(2) . . . . ?
C16 C11 C12 C13 -0.8(2) . . . . ?
P C11 C12 C13 -177.13(12) . . . . ?
O4 C12 C13 C14 -178.43(15) . . . . ?
C11 C12 C13 C14 2.1(2) . . . . ?
C18 O5 C14 C15 9.1(3) . . . . ?
C18 O5 C14 C13 -171.50(18) . . . . ?
C12 C13 C14 O5 178.34(14) . . . . ?
C12 C13 C14 C15 -2.2(3) . . . . ?
O5 C14 C15 C16 -179.65(15) . . . . ?
C13 C14 C15 C16 1.0(3) . . . . ?
C14 C15 C16 C11 0.4(3) . . . . ?
C12 C11 C16 C15 -0.5(2) . . . . ?
P C11 C16 C15 175.48(12) . . . . ?

_diffrn_measured_fraction_theta_max 0.934
_diffrn_reflns_theta_full        68.25
_diffrn_measured_fraction_theta_full 0.934
_refine_diff_density_max         0.221
_refine_diff_density_min         -0.222
_refine_diff_density_rms         0.038
_chemical_compound_source        'St. Catharines, Ontario (Canada)'
_exptl_crystal_recrystallization_method 'Hot ethanol'
